# Supplementary material for: A two-dimensional MXene-supported CuRu catalyst for efficient electrochemical nitrate reduction to ammonia
Source: Royal Society of Chemistry journal article supplement (doi:10.1039/d3cy01009k), 2023-01-01
Supplement: d3cy01009k1.pdf [file d3cy01009k1.pdf]

## Electronic Supplementary Information

### **A two-dimensional MXene-supported CuRu catalyst for efficient electrochemical nitrate reduction to ammonia**

Fang Zhao <sup>a</sup>, Guangxin Li <sup>a</sup>, Qianqian Hua <sup>a</sup>, Jianghui Cao <sup>a</sup>, Jiliang Song <sup>a</sup>, Liguao Gao <sup>a</sup>, Tingli

Ma <sup>c, d</sup>, Xuefeng Ren <sup>b, \*</sup>, Anmin Liu <sup>a, \*</sup>

<sup>a</sup> State Key Laboratory of Fine Chemicals, School of Chemical Engineering, Dalian University of Technology, China.

E-mail: [liuanmin@dlut.edu.cn](mailto:liuanmin@dlut.edu.cn)

<sup>b</sup> School of Ocean Science and Technology, Dalian University of Technology, Panjin, 124221, China.

E-mail: [renxuefeng@dlut.edu.cn](mailto:renxuefeng@dlut.edu.cn)

<sup>c</sup> Department of Materials Science and Engineering, China Jiliang University, Hangzhou, 310018, China.

<sup>d</sup> Graduate School of Life Science and Systems Engineering, Kyushu Institute of Technology, 2-4 Hibikino, Wakamatsu, Kitakyushu, Fukuoka 808-0196, Japan.

### Preparation of working electrode

A homogeneous catalyst ink was created by dissolving 10 mg of the produced Ru-Cu/Cu<sub>2</sub>O@Ti<sub>3</sub>C<sub>2</sub> catalyst in 1 mL of isopropanol, adding 30  $\mu$ L of 5 wt% Nafion solution, and then sonicating the mixture for 30 minutes. Then, 20  $\mu$ L of catalyst ink was deposited onto a glassy carbon electrode with a 5 mm diameter and allowed to dry in the open air.

### Electrochemical Measurements

The electrocatalytic NO<sub>3</sub>RR and NRR tests were performed on a CHI760E electrochemical workstation in Shanghai, used for the three-electrode test system. Platinum wire as a counter electrode, Ag/AgCl as reference electrode, 0.1 M KOH and 0.1 M KNO<sub>3</sub> as electrolyte. 10 mg of catalyst and 30  $\mu$ L of Nafion solution (5 wt%) were dispersed in 970  $\mu$ L of isopropanol and sonicated for 1 h to obtain a homogeneous suspension. Then, 20  $\mu$ L of catalyst dispersion was dropped onto a smooth glassy carbon working electrode (effective area 0.196 cm<sup>2</sup>), which was naturally dried and used as the working electrode. All potentials obtained in the experiments were converted to reversible hydrogen electrodes (RHE).

Before the electrochemical NO<sub>3</sub>RR test, high-purity Ar should be introduced into the electrolyte for up to 30 min to ensure complete discharge of dissolved impurity gases, followed by a linear scanning voltammetric curve (LSV) test at a scan rate of 5 mV s<sup>-1</sup>. In this study, NO<sub>3</sub>RR experiments were conducted utilizing a chrono-current approach (i-t) with a continuous scan at potentials ranging from -0.1 V to -0.8 V (vs. RHE) for 2 hours. Ar was continuously supplied throughout the testing to create a gas protection

barrier. The reproducibility test was carried out by reconstituting the working electrode after each 2-hour NO<sub>3</sub>RR procedure, and the stability cycle test was carried out by scanning the electrochemical NO<sub>3</sub>RR procedure using the chrono-current method for 24 hours. Both tests were carried out at optimal potentials. The nitrogen source and protective gas for NRR was N<sub>2</sub>, the electrolyte was 0.1 M KOH, and the other experimental conditions were as stated above.

**Determination of NH<sub>3</sub>:** The determination of NH<sub>3</sub> was determined by the indophenol blue and spectrophotometric methods in this experiment. 5 g of sodium salicylate and 5 g of sodium tartrate were dissolved in 100 mL of 1 M KOH as color developer (A). Then 5 mL of NaClO (14% effective chlorine content) was added to 100 mL of deionized water to prepare color developer (B). Finally, as color developer C, 0.2 g sodium nitrosoferricyanide was dissolved in 20 mL of deionized water. The concentrations of 0, 0.1, 0.2, 0.4, 0.6, 0.8, and 1.0 µg/mL ammonium chloride were prepared as standard solutions. Then, 2 ml of standard solution was added to the test tube, followed by 2 ml of color developer A, 1 ml of color developer B and 0.2 mL of color developer C. The mixed solution was then shaken well. After standing for 1 hour, the hybrid solution was transferred to a cuvette and detected by UV-Vis spectrophotometer. The UV-Vis absorption spectrum was obtained according to the absorbance at 655 nm. The concentration-absorbance curve (Figure S4) was obtained using a series of standard NH<sub>4</sub>Cl solutions, and was fitted by linear regression,  $y = 0.30609x - 0.00644$ ;  $R^2 = 0.9995$ .

The following equation calculates the NH<sub>3</sub> production rate.

$$\text{NH}_3 \text{ production rate} = (c \times V)/(t \times A) \quad (1)$$

is the electrochemical test time (h), and A is the effective geometric area of the working electrode ( $\text{cm}^2$ ). Where, c is the measured ammonia concentration and V is the volume (mL).

FE can be calculated by the following equation.

$$\text{FE} = 8F \times c \times V / 17 \times Q \quad (2),$$

where one  $\text{NH}_3$  molecule requires the production of 8 electrons, F is Faraday's constant, and Q is the amount of electricity consumed in the electrochemical test.

**Determination of  $\text{N}_2\text{H}_4$ :** The color developer is 4g of dimethylbenzaldehyde dissolved in a mixture of 20ml of concentrated hydrochloric acid and 200 ml of ethanol. 1ml of 1000 $\mu\text{g/ml}$  hydrazine standard solution was placed in a 100ml volumetric flask and fixed with 0,1 M KOH, followed by the configuration of standard solutions with concentrations of 0.2, 0.4, 0.8, 1.2, 1.8 $\mu\text{g/ml}$ , respectively. Add 1.5 mL of standard solution or sample solution into the centrifuge tube, add 1.5ml of color developer, shake to make the color developer fully act, leave it for 1 h, measure the concentration of  $\text{N}_2\text{H}_4$  in the solution using UV-vis spectrophotometer, and plot the standard curve with absorbance as the y-axis and the concentration of  $\text{N}_2\text{H}_4$  as the x-axis.

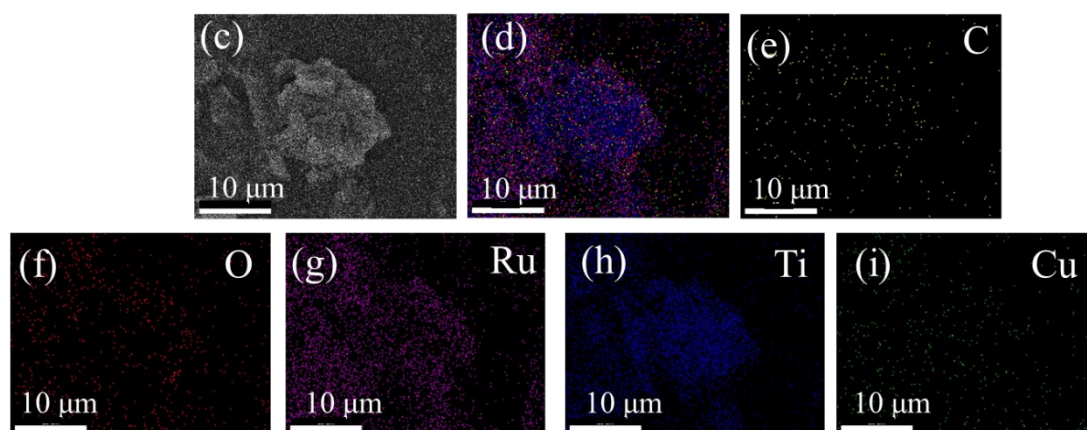

**Figure S1** Ru-Cu/Cu<sub>2</sub>O@Ti<sub>3</sub>C<sub>2</sub> low-magnification EDS spectrum and corresponding elemental distribution

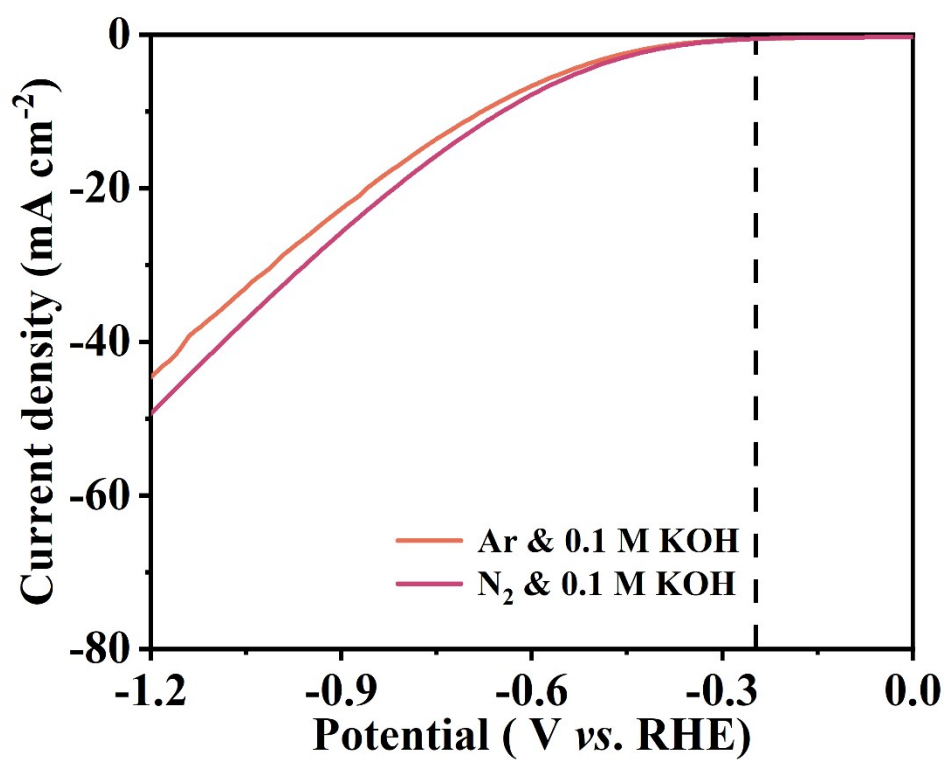

**Figure S2** LSV curves of Ru-Cu/Cu<sub>2</sub>O@Ti<sub>3</sub>C<sub>2</sub>-catalyzed NRR

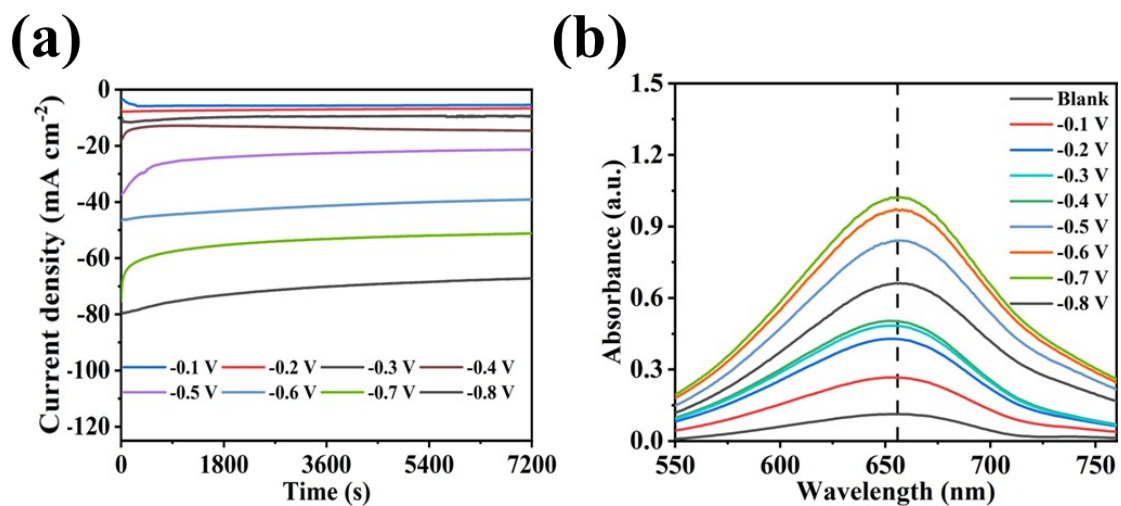

**Figure S3** Ru-Cu/Cu<sub>2</sub>O@Ti<sub>3</sub>C<sub>2</sub>-catalyzed NO<sub>3</sub>RR: (a) i-t test curve; (b) UV absorbance test of NH<sub>4</sub><sup>+</sup> in electrolyte

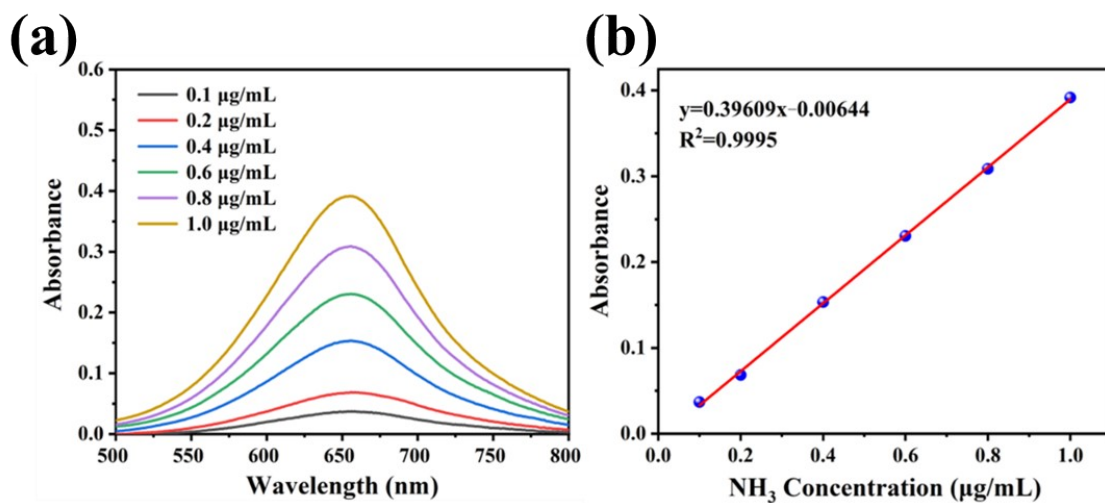

**Figure S4** Plotting of standard curve of NH<sub>3</sub> in 0.1 M KOH solution.

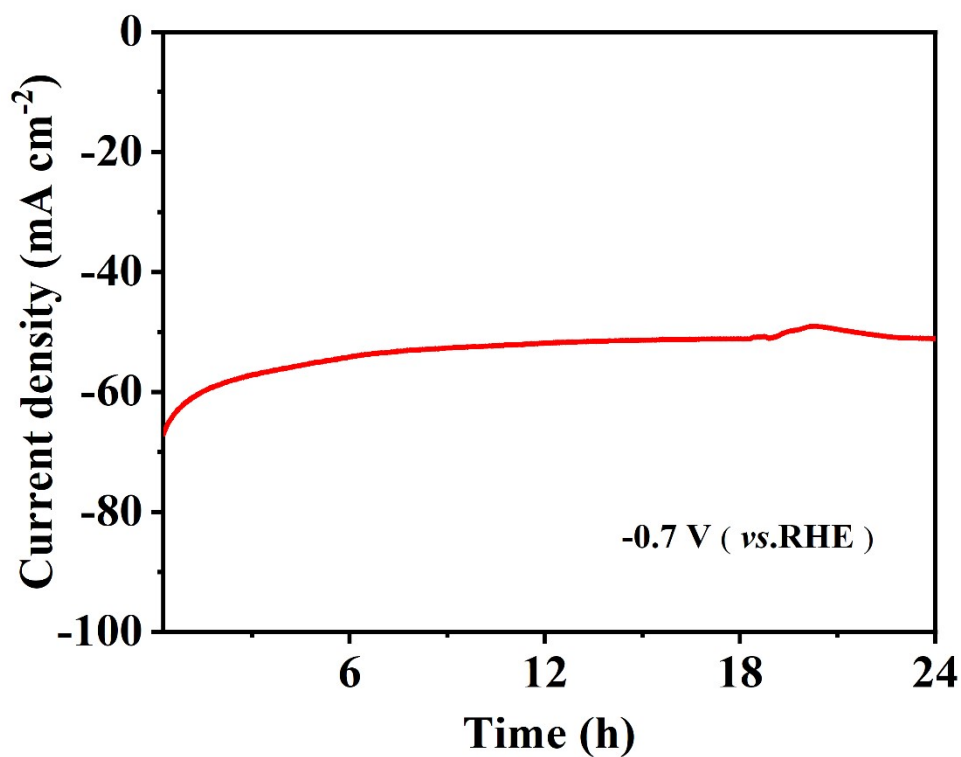

Figure S5 24-h current density variation of Ru-Cu/Cu<sub>2</sub>O@Ti<sub>3</sub>C<sub>2</sub>-catalyzed NO<sub>3</sub>RR

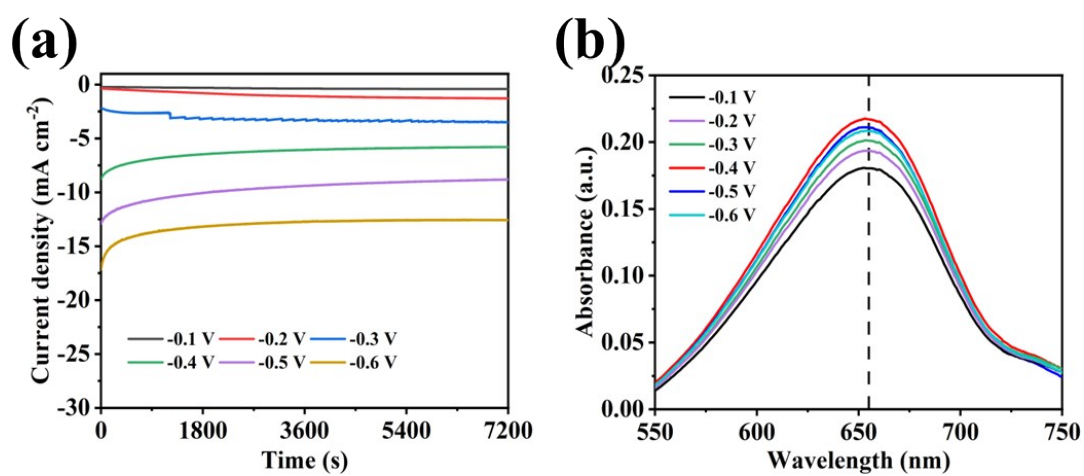

Figure S6 Ru-Cu/Cu<sub>2</sub>O@Ti<sub>3</sub>C<sub>2</sub>-catalyzed NRR; (a) i-t test curve; (b) absorbance test of NH<sub>4</sub><sup>+</sup> in electrolyte

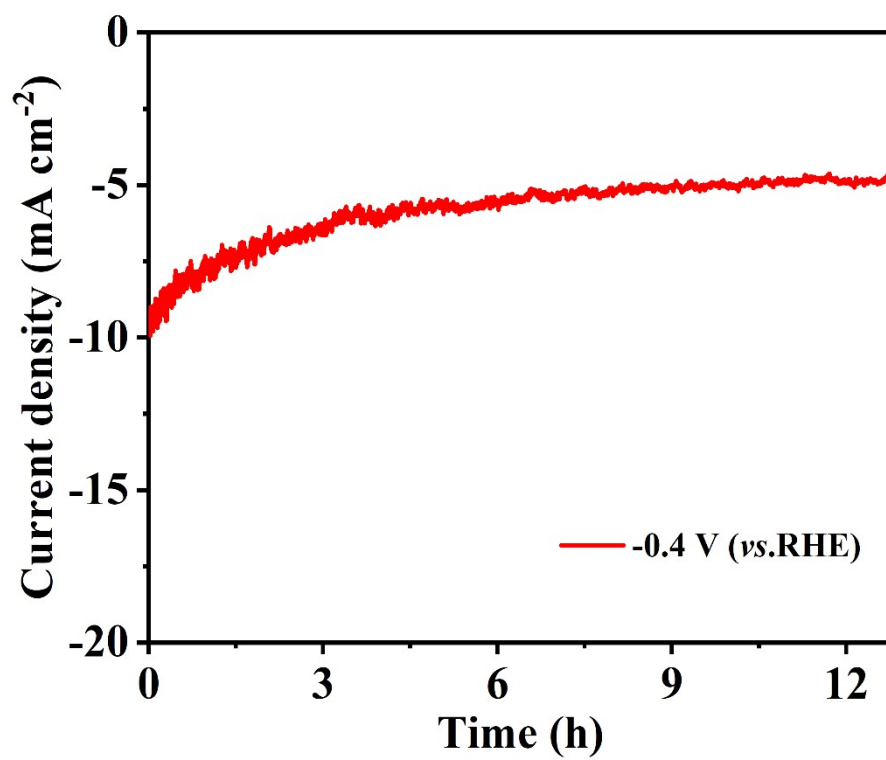

**Figure S7** 12-h current density test of Ru-Cu/Cu<sub>2</sub>O@Ti<sub>3</sub>C<sub>2</sub>-catalyzed NRR
